# Supplementary material for: Role of cytosolic, tyrosine‐insensitive prephenate dehydrogenase in Medicago truncatula
Source: PubMed Central journal article supplement — Plant Direct. 2020 May 3;4(5):e00218. doi: 10.1002/pld3.218 (PMC7196213; doi:10.1002/pld3.218), 2020-05-03
Supplement: PLD3-4-e00218-s001.pdf [file PLD3-4-e00218-s001.pdf]

**Supplementary Data for:**

**Title of article:** Role of Cytosolic, Tyrosine-Insensitive Prephenate Dehydrogenase in *Medicago truncatula*

**Authors:** Craig A. Schenck<sup>1,2</sup>, Josh Westphal<sup>1</sup>, Dhileepkumar Jayaraman<sup>3</sup>, Kevin Garcia<sup>3,4</sup>, Jiangqi Wen<sup>5</sup>, Kirankumar S. Mysore<sup>5</sup>, Jean-Michel Ané<sup>3,6</sup>, Lloyd W. Sumner<sup>7,8</sup> and Hiroshi A. Maeda<sup>1,\*</sup>

**Affiliations:** <sup>1</sup>Department of Botany, University of Wisconsin-Madison, Madison, WI 53706

<sup>2</sup> Current address: Department Biochemistry and Molecular Biology, Michigan State University, East Lansing, MI 48824

<sup>3</sup> Department of Bacteriology, University of Wisconsin-Madison, Madison, WI 53706

<sup>4</sup> Department of Crop and Soil Sciences, North Carolina State University, Raleigh, NC 27695

<sup>5</sup> Noble Research Institute, LLC., Ardmore, OK, USA

<sup>6</sup> Department of Agronomy, University of Wisconsin-Madison, Madison, WI 53706

<sup>7</sup> Department of Biochemistry, University of Missouri, Columbia, MO 65211

<sup>8</sup> Metabolomics and Bond Life Sciences Centers, University of Missouri, Columbia, MO 65211

\*Corresponding author: Hiroshi A. Maeda (maeda2@wisc.edu)

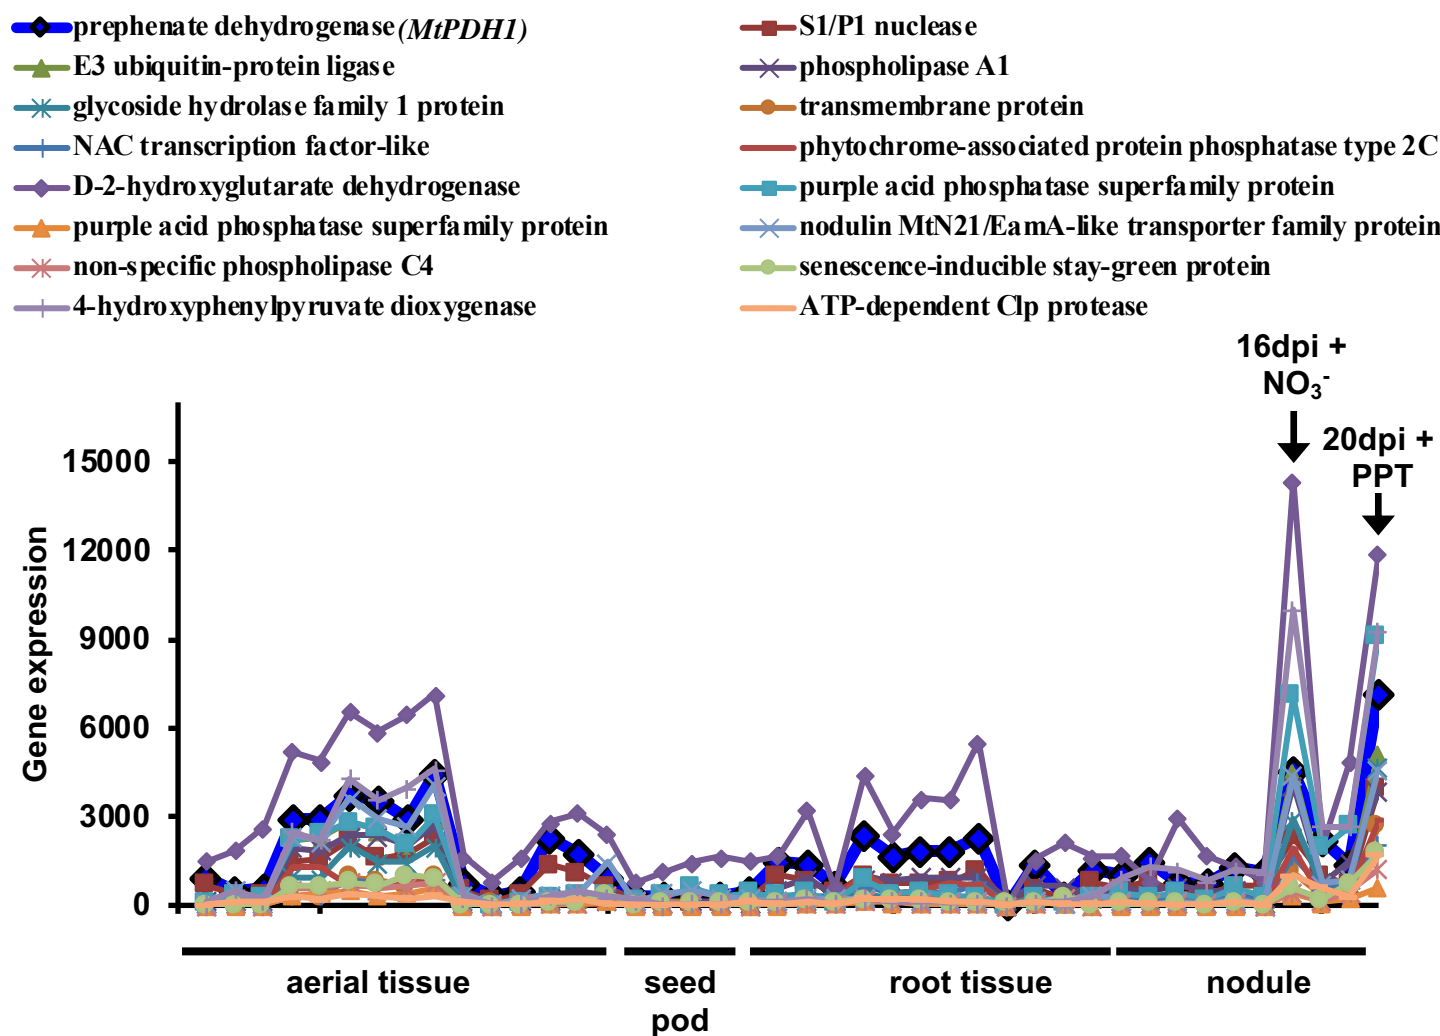

**Supplementary Figure 1. Co-expression analysis of *MtPDH1*.** Co-expressed genes with *MtPDH1* were identified in various tissue-types and treatments using the Medicago gene expression atlas ([www.mtgea.noble.org/v3/](http://www.mtgea.noble.org/v3/)) with a Pearson's correlation coefficient of > 0.7. *MtPDH1* (blue line with square symbols) was co-expressed with senescence related genes, including proteases, lipases as well as HPP dioxygenase (HPPD), which catalyzes the initial step in Tyr catabolism. Additionally, *MtPDH1* was induced under two nodule conditions, highlighted by black arrows, that likely trigger senescence related processes, 16 dpi + nitrate (NO<sub>3</sub><sup>-</sup> Benedito et al., 2008) and 20 dpi + Phosphinothricin (PPT) treatment (Seabra et al., 2012).

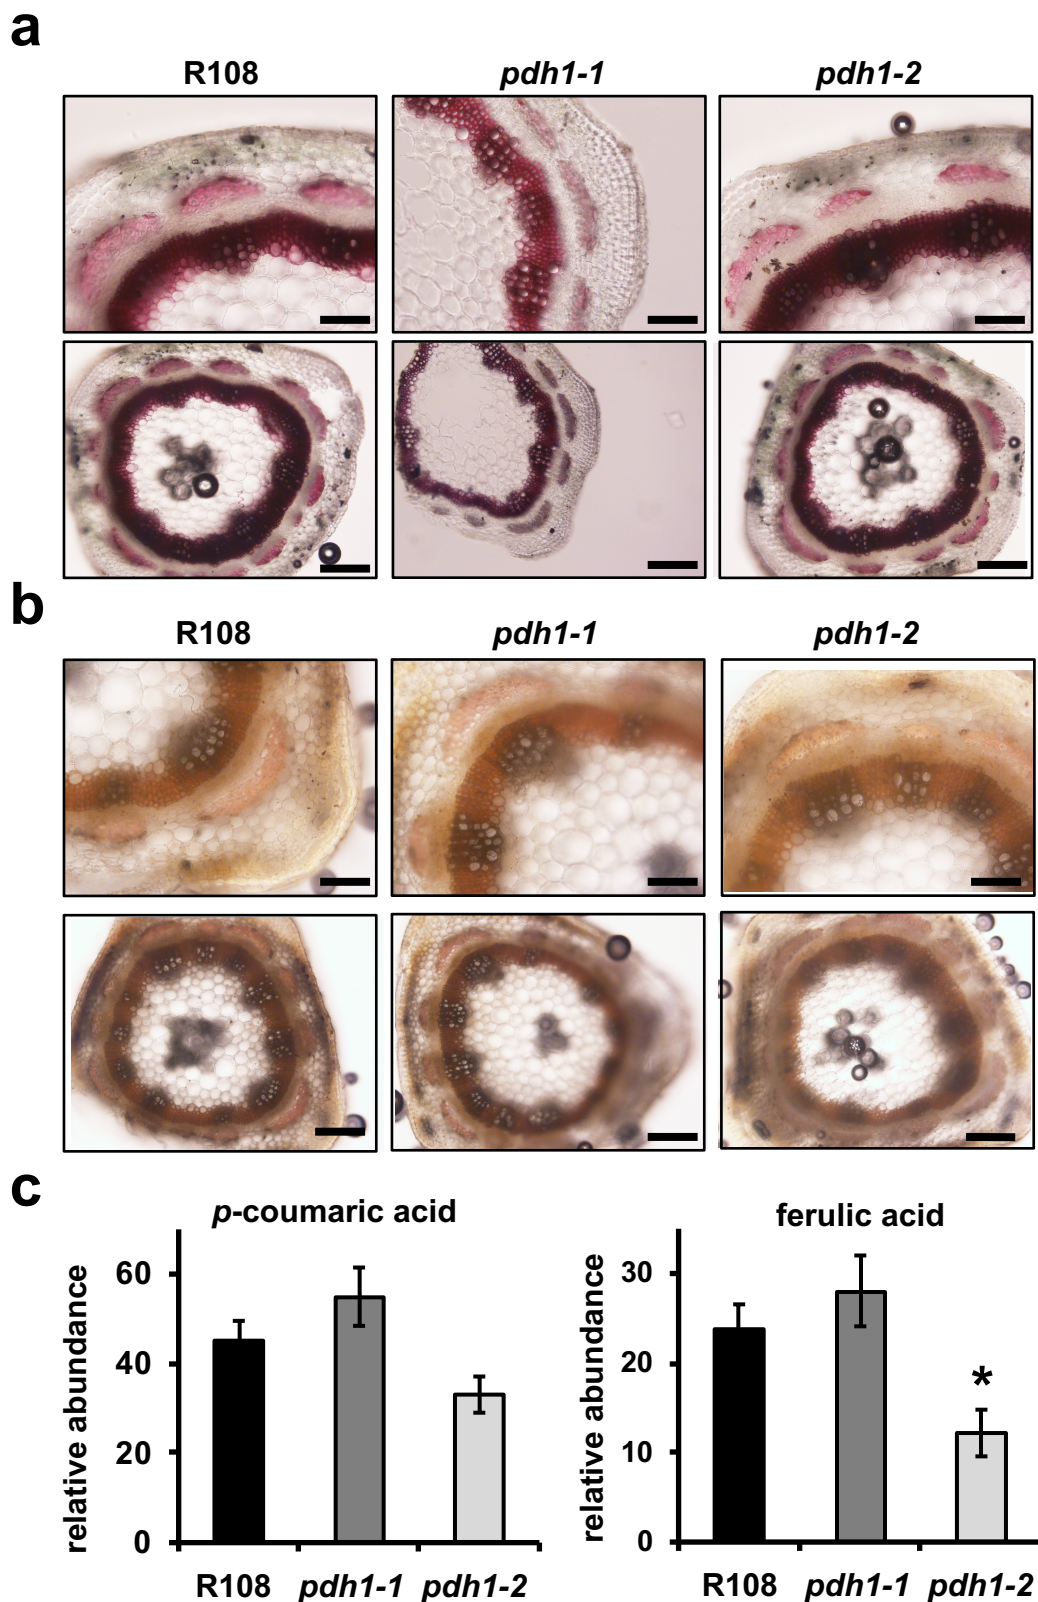

**Supplementary Figure 2. Effects of PDH pathway mutations on Phe-derived metabolism.** Lignin composition and linkages were assessed in Wt (R108) and mutants using two histochemical stains (**a**) phloroglucinol, and (**b**) Mäule staining. The top panel is 10x magnification (scale bars 50  $\mu$ m), bottom panel is 4x magnification (scale bars 125  $\mu$ m). Equal staining was observed in mutants compared with Wt (R108). (**c**) Phenylpropanoid compounds that serve as lignin precursors measured using GC-MS. Bars represent average metabolite abundance  $\pm$  s.e.m of  $n \geq 3$  biological replicates. Significant differences to Wt control are indicated; \* $P \leq 0.05$ .

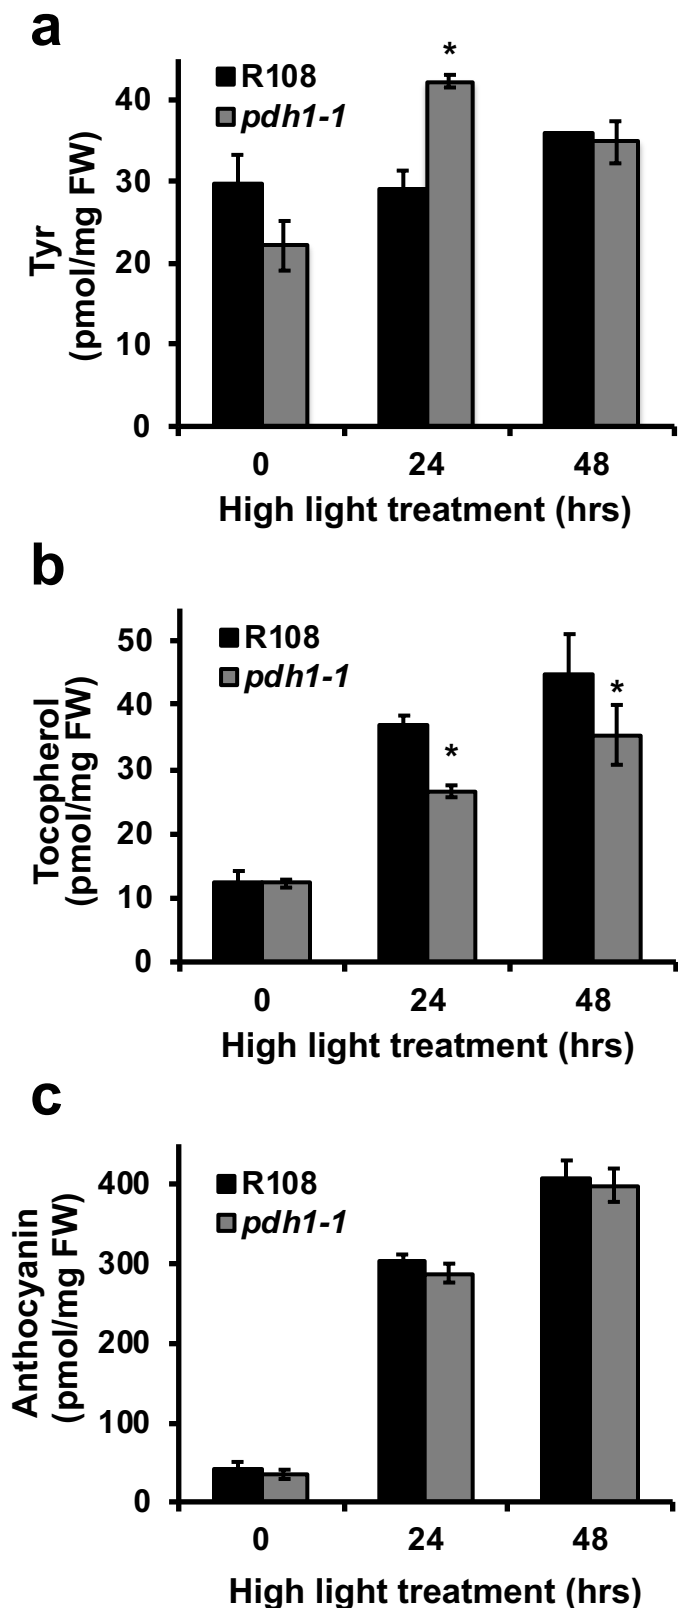

**Supplementary Figure 3. High light treatment stimulates Tyr- and Phe-derived metabolism.** Whole plants were moved from standard light (~200  $\mu$ E) to high light (~950  $\mu$ E) conditions and leaves from Wt (R108, black) and *pdh1-1* (gray) were collected after 0, 24, and 48hrs. Metabolites were extracted and identified using HPLC (Tyr and tocopherols) or spectrophotometrically (anthocyanins). Absolute quantification of Tyr (**a**), tocopherols (**b**), and anthocyanins (**c**) are shown as the average pmol/mg FW  $\pm$  s.e.m of n = 3 biological replicates. Significant differences from the Wt (R108) control at the respective timepoints are indicated; \* $P \leq 0.05$ .

**a**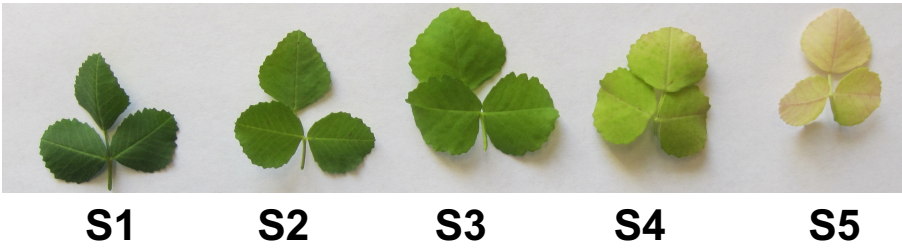**b**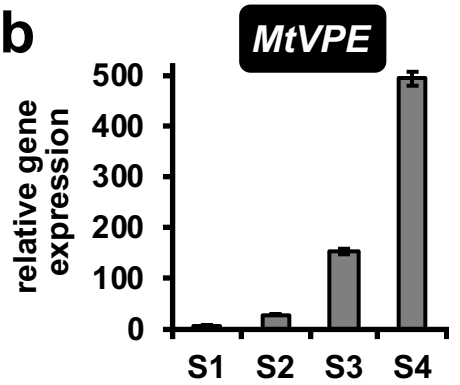**c**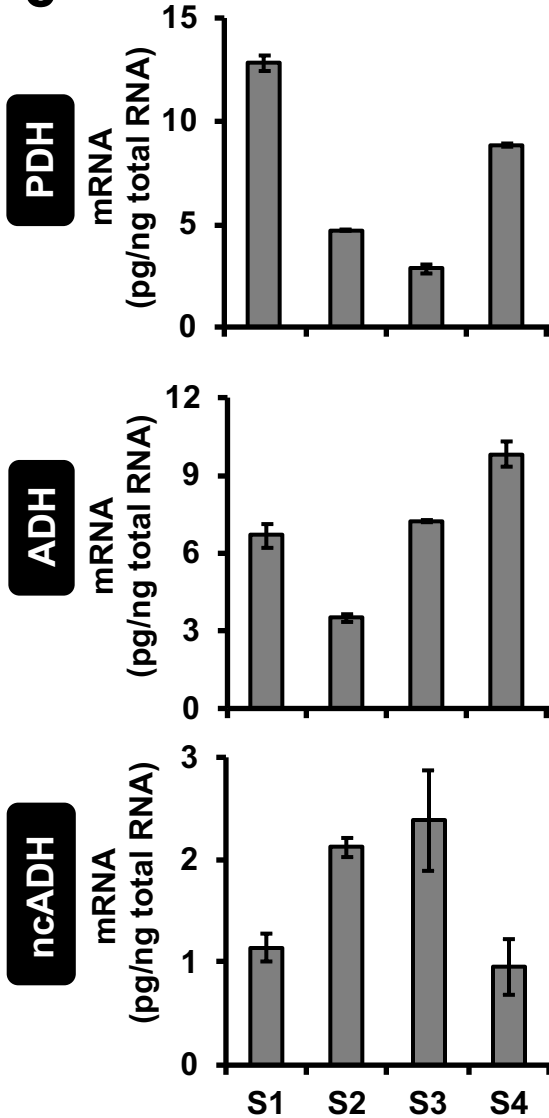**d**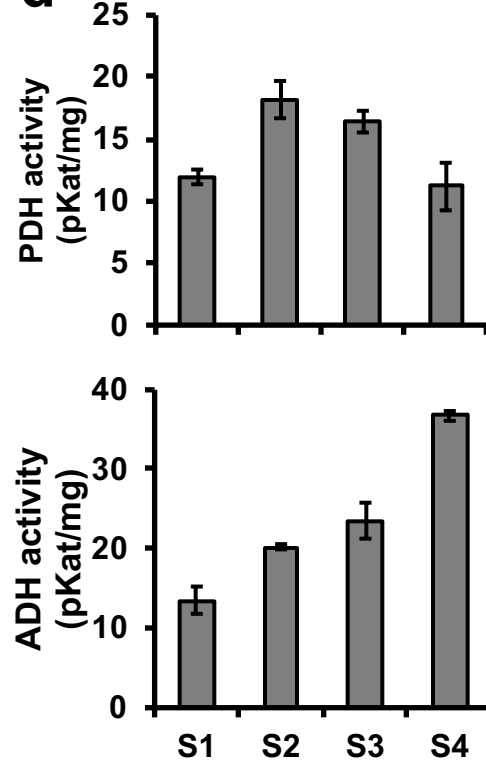

**Supplementary Figure 4. PDH and ADH gene expression and enzymatic activity in senescing leaves.** (a) Representative developmental time series of senescing Wt (R108) leaves used for gene expression (b,c) and enzymatic activity (d) analyses. High quality RNA and enzymes were obtained for all developmental stages except for S5. (b) A senescent marker gene (vacuolar processing enzyme, *MtVPE* Medtr1g016780, Pérez Guerra et al., 2010), was used as a control for qRT-PCR. Bars are average mRNA abundance  $\pm$  s.e.m. of  $n = 3$  biological replicates. (c) qRT-PCR analysis of *PDH* and *ADH* expression in senescing leaves, bars represent absolute mRNA abundance (pg/ng total RNA)  $\pm$  s.e.m. of  $n = 3$  biological replicates. (d) *PDH* and *ADH* enzymatic activity from senescing leaves. Bars represent average enzymatic activity (pKat/mg)  $\pm$  s.e.m. of  $n = 3$  biological replicates.

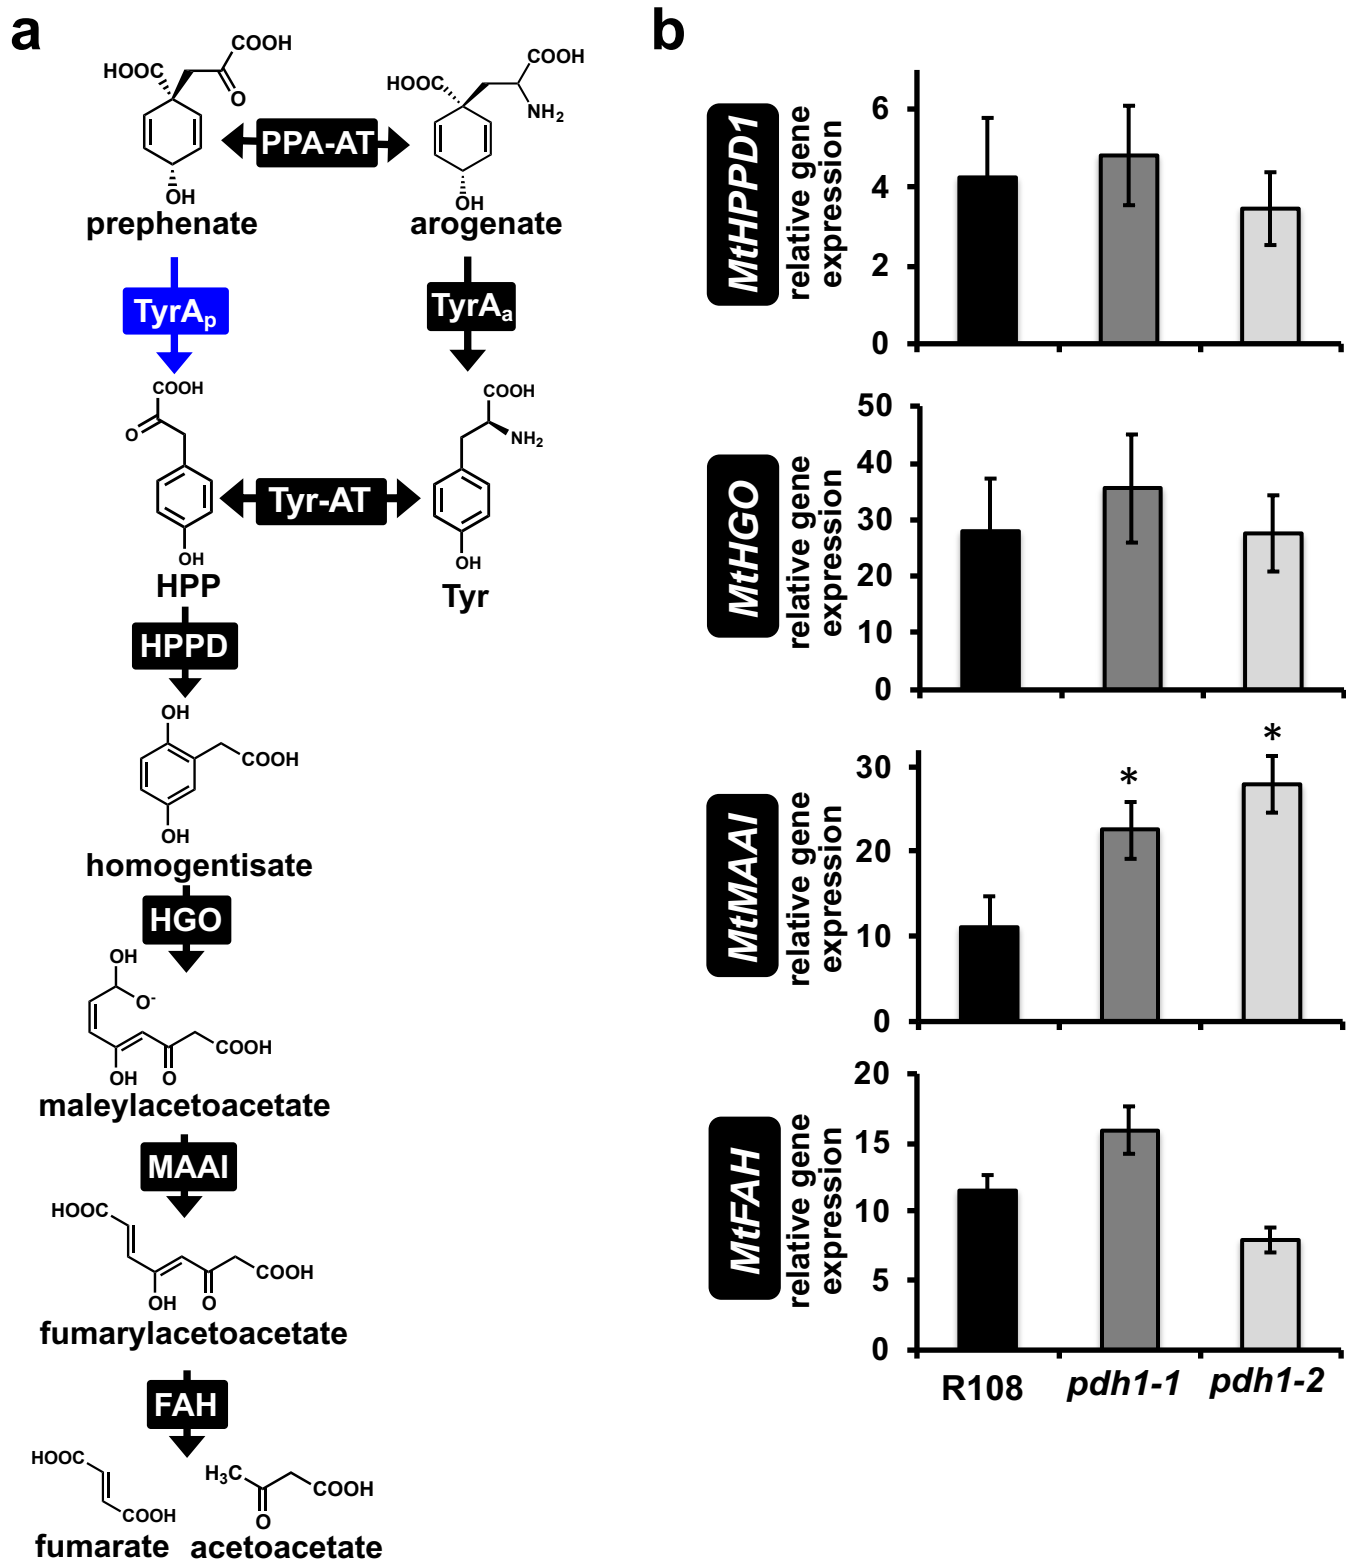

**Supplementary Figure 5. Tyr degradation pathway and gene expression in PDH mutants.** (a) The canonical Tyr catabolism pathway in plants. PDH (blue) provides a direct route to HPP and the Tyr catabolic pathway avoiding three ADH pathway steps (PPA-AT, TyrA<sub>a</sub>, and Tyr-AT). (b) Gene expression analysis of Tyr catabolic pathway enzymes from RNA extracted from six week old leaf tissue from Wt (R108) and *mtpdh1* mutants. Bars represent average gene expression normalized to a housekeeping gene (*MtPI4K*) ± s.e.m. of n = 3 biological replicates. Significant differences to Wt (R108) control are indicated; \**P* ≤ 0.05. FAH, fumarylacetoacetate hydrolase; HGO, homogentisate 1,2-dioxygenase; HPPD, HPP dioxygenase; MAAI, maleylacetoacetate isomerase; TyrA<sub>a</sub>, aroenate dehydrogenase; TyrA<sub>p</sub>, prephenate dehydrogenase; Tyr-AT; Tyr-aminotransferase.

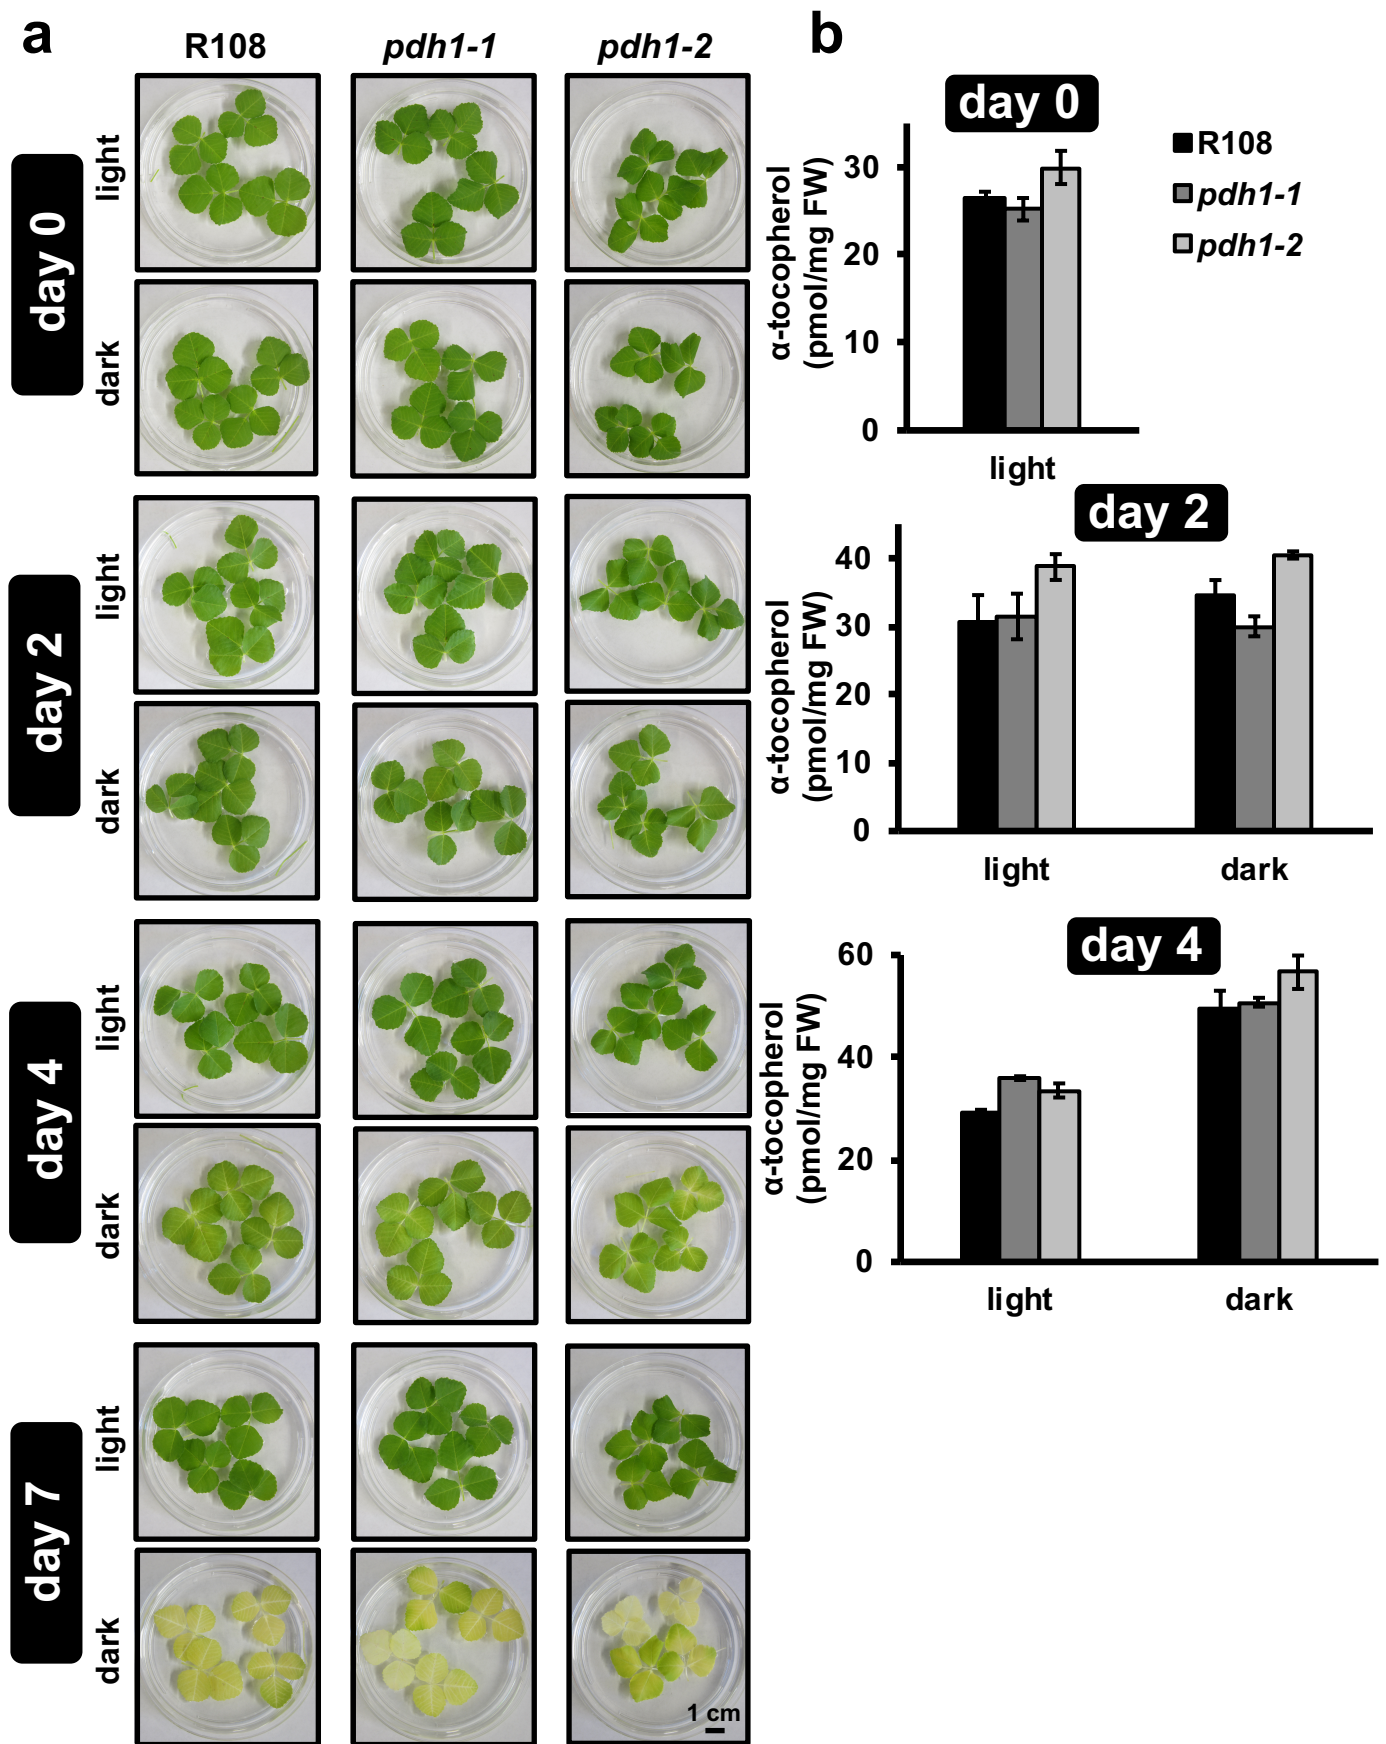

**Supplementary Figure 6. Dark-induced senescence leads to accumulation of tocopherols.** (a) Excised leaves from six week old Wt and *mpdh1* mutants were floated on H<sub>2</sub>O and treated in the dark, or left under normal light conditions for seven days. Dark-induced senescence progressed equally for Wt (R108) and mutants. (b)  $\alpha$ -tocopherol content measured from leaves during the dark treatment expressed in pmol/mg FW  $\pm$  s.e.m. of n = 3 biological replicates.

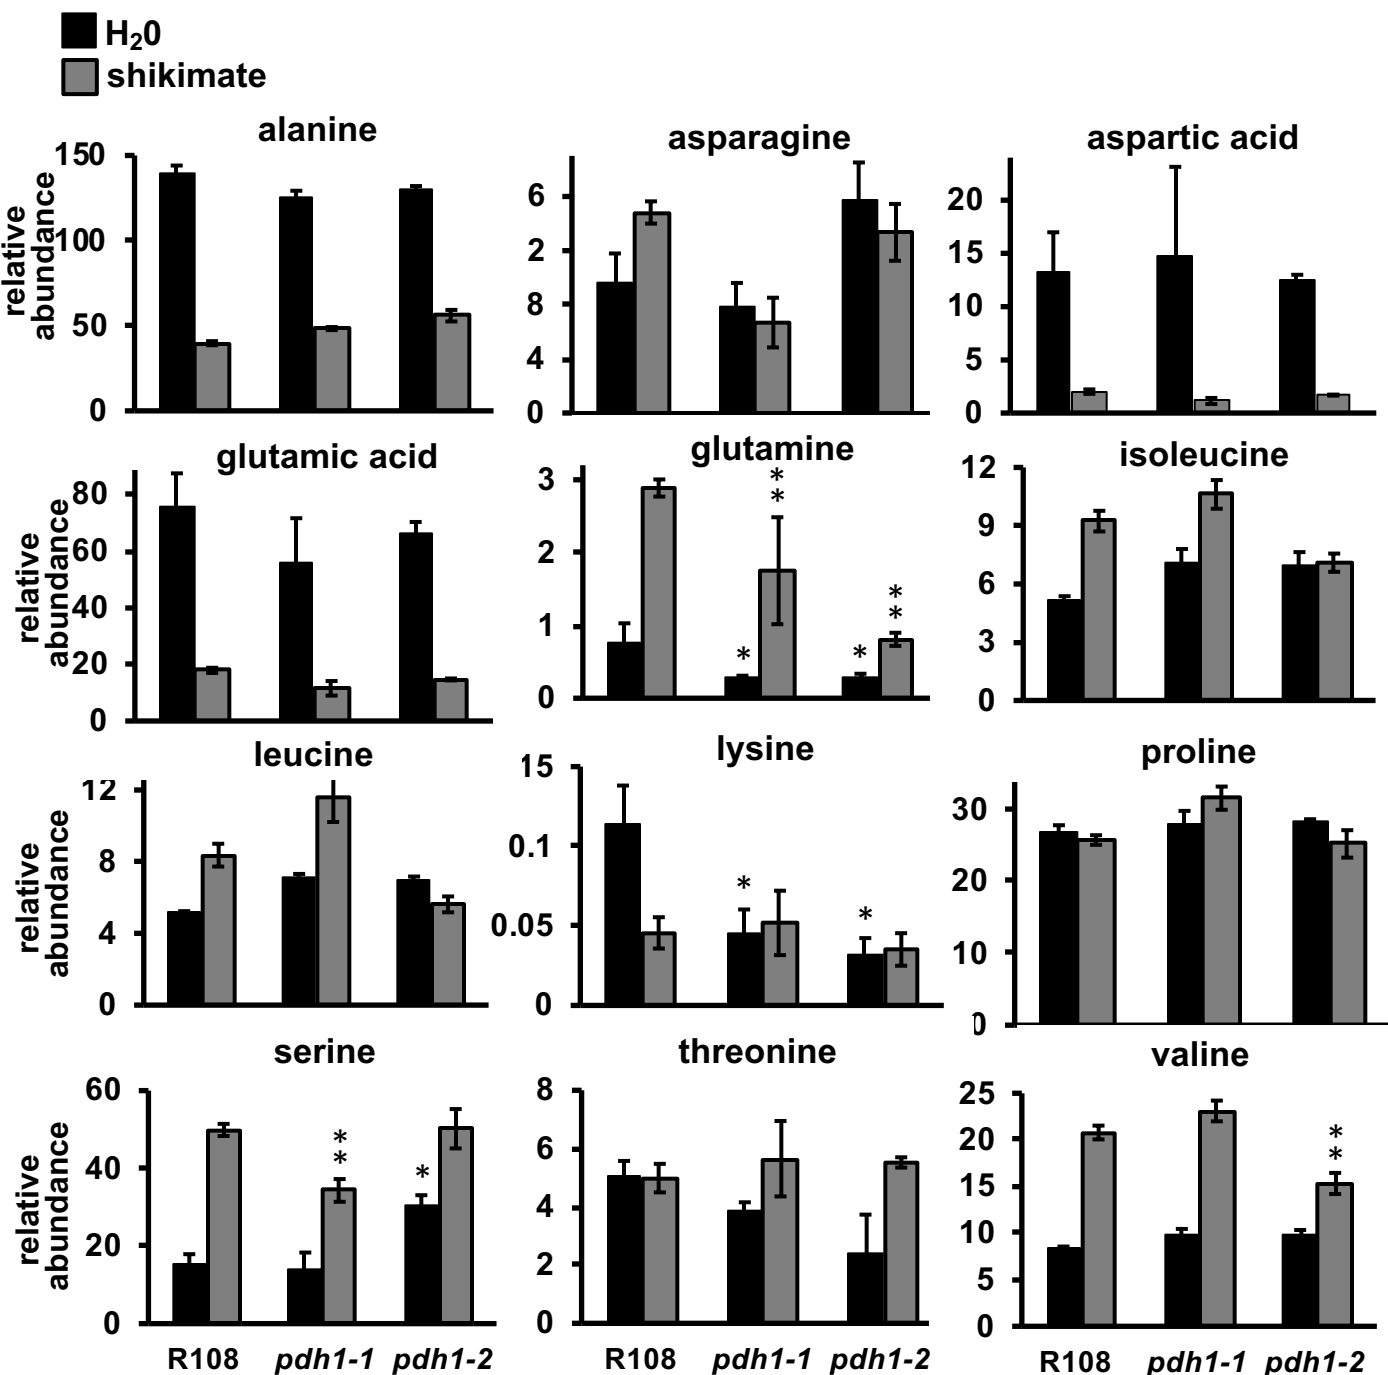

**Supplementary Figure 7. Additional amino acids from shikimate feeding in Wt and mutants.** Excised leaves from six week old plants were floated on H<sub>2</sub>O (black bars) or a solution of 25 mM shikimate (Tyr precursor) (gray bars) for eight hours. Leaves were then used for metabolite extraction and identification using GC-MS. Relative abundance of the corresponding metabolites are the average  $\pm$  s.e.m of  $n = 3$  biological replicates. Significant differences from the water fed control (R108, black) are indicated; \* $P \leq 0.05$ , significant differences from the shikimate fed control (R108 gray) are indicated \*\* $P \leq 0.05$ .



H<sub>2</sub>O  
 shikimate

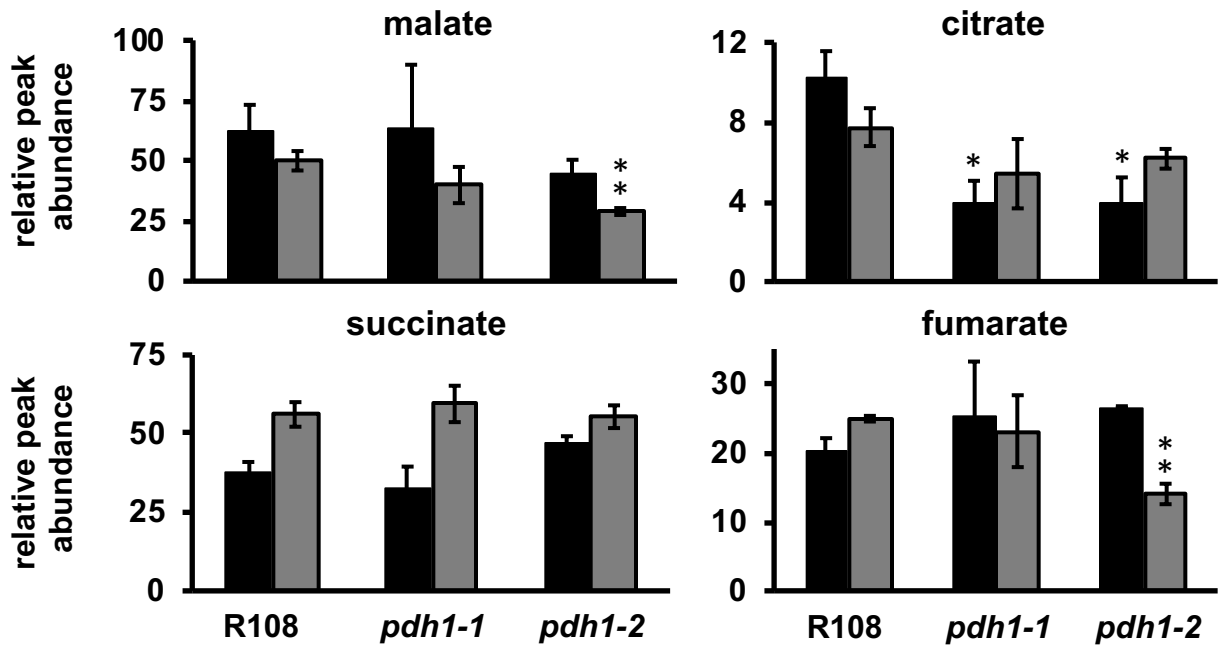

**Supplementary Figure 8. TCA metabolite levels following shikimate feeding in Wt and mutants.** Excised leaves from six week old plants were floated on H<sub>2</sub>O (black bars) or a solution of 25 mM shikimate (Tyr precursor) (gray bars) for eight hours. Leaves were then used for metabolite extraction and identification using GC-MS. Relative abundance the corresponding metabolites are the average ± s.e.m of n = 3 biological replicates. Significant differences from the water fed control (R108, black) are indicated; \* $P \leq 0.05$ , significant differences from the shikimate fed control (R108 gray) are indicated \*\* $P \leq 0.05$ .

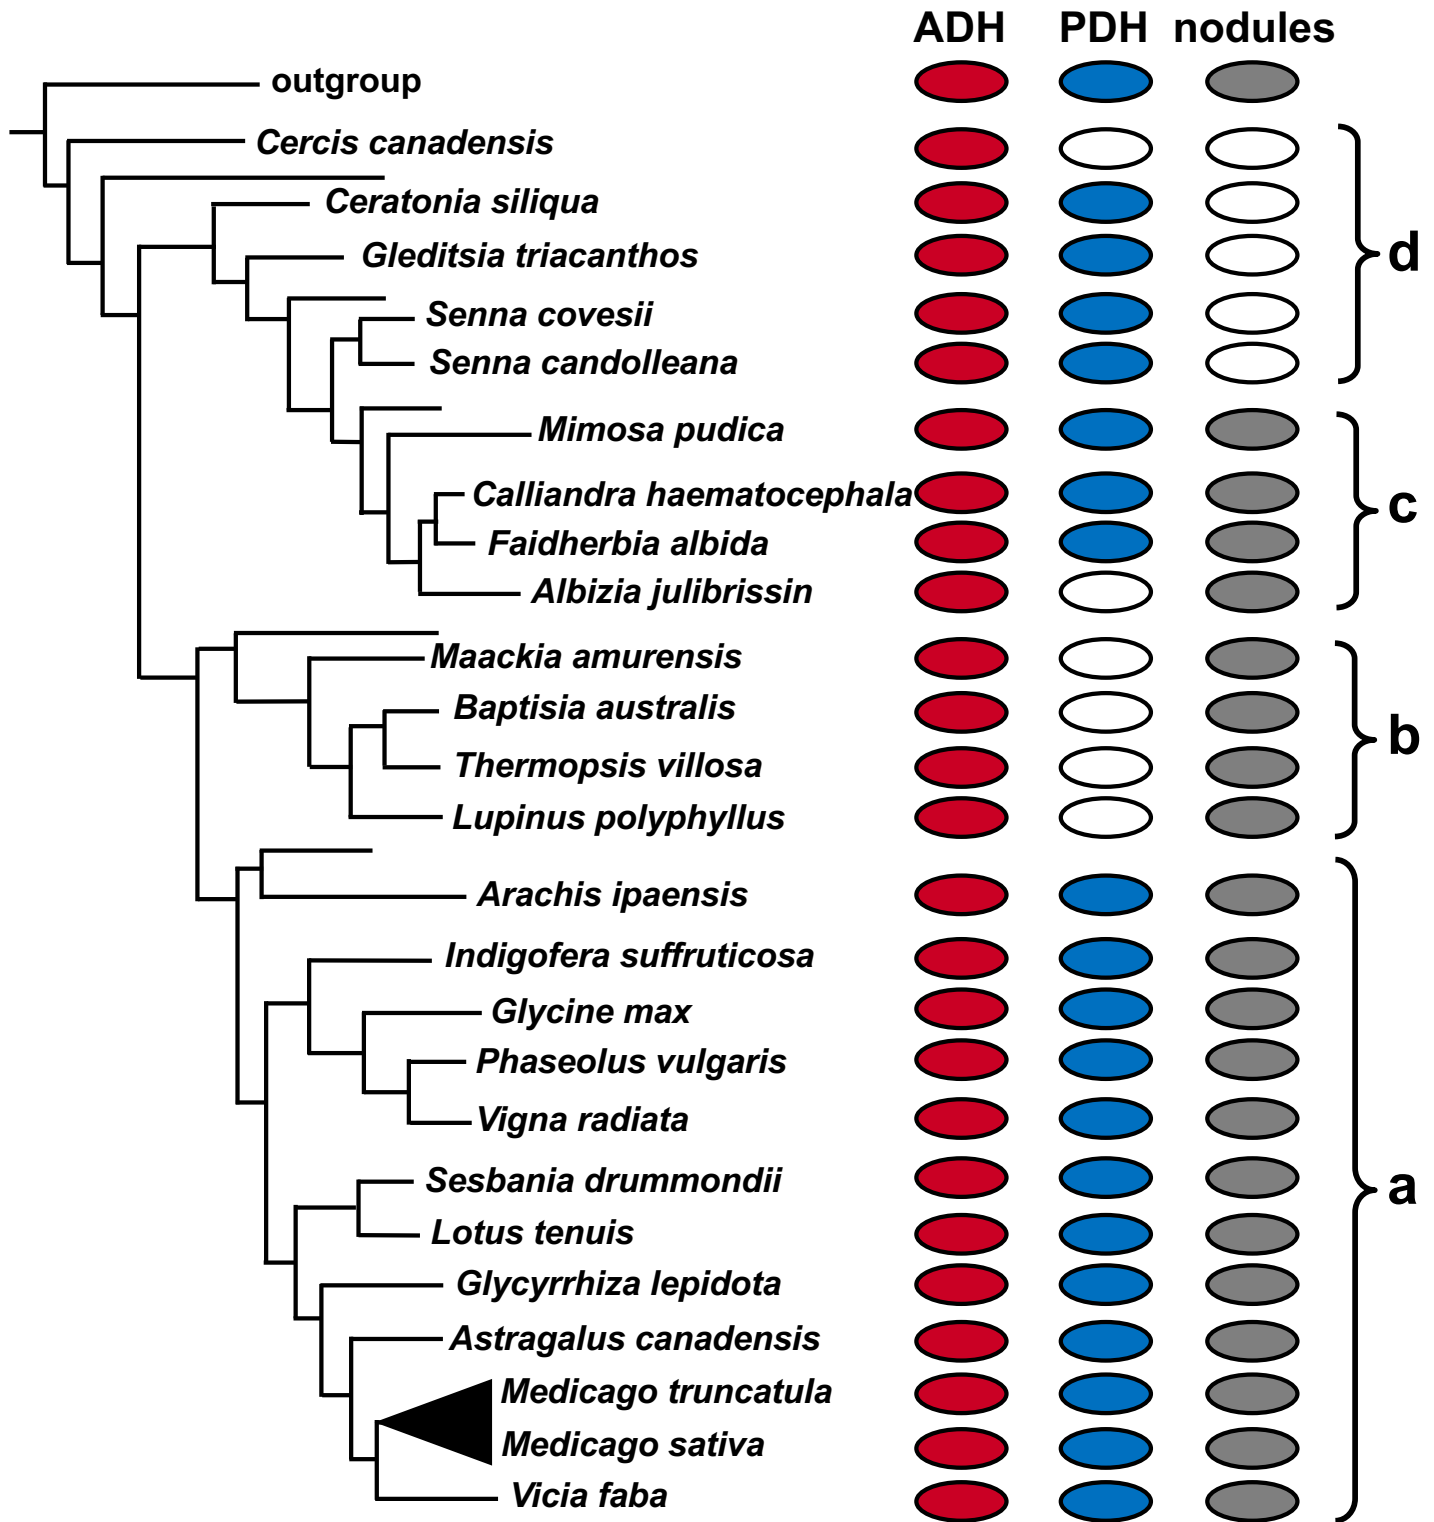

**Supplemental Figure 9. Phylogenetic distribution of ADH and PDH activity and nodulation status across the Leguminosae family.** ADH and PDH activities were assayed in various legume species, including (a) a clade containing many crop legumes, (b) genistoid crown clade, (c) mimosoid crown clade, and (d) early diverging lineages. They are mapped onto a representative phylogeny of Leguminosae (Azani et al., 2017). Filled circles with red and blue colors indicate the presence of ADH and PDH activity, respectively, whereas empty circles represent the absence of enzymatic activity. Filled circles with gray denote legumes that form nodules, whereas empty circles represent legumes that do not form nodules, based on Afkhami et al. (2018).

**Supplementary Table 1. Non-targeted metabolite analysis from leaf tissue of Wt and *mtpdh1-1***

| <b>Metabolite</b>       | <b>retention time (min)</b> | <b>Ion (m/z)</b> | <b>pdh1-1/R108</b> | <b>pdh1-2/R108</b> | <b>T-test pdh1-1:R108</b> | <b>T-test pdh1-2:R108</b> |
|-------------------------|-----------------------------|------------------|--------------------|--------------------|---------------------------|---------------------------|
| <b>Beta-Alanine</b>     | 21.5809                     | 248.1            | NS                 | 1.49638            | NS                        | 0.04629                   |
| <b>beta-D-glucoside</b> | 32.1517                     | 204.1            | 1.18350            | 2.20999            | 0.01116                   | 0.00016                   |
| <b>Citric Acid</b>      | 30.5877                     | 273.1            | NS                 | 1.51560            | NS                        | 0.00027                   |
| <b>D-(+)-Melibiose</b>  | 43.5201                     | 204.1            | 0.72128            | NS                 | 0.03323                   | NS                        |
| <b>Ferulic Acid</b>     | 36.1830                     | 338.2            | NS                 | 0.51230            | NS                        | 0.01121                   |
| <b>Gentisic Acid</b>    | 29.4116                     | 355.2            | NS                 | 2.85714            | NS                        | 0.00001                   |
| <b>Glucuronic Acid</b>  | 29.1234                     | 292.2            | NS                 | 1.58440            | NS                        | 0.00001                   |
| <b>Glycolic Acid</b>    | 11.8422                     | 205.1            | 1.42874            | 1.92904            | 0.01487                   | 0.00037                   |
| <b>L-Alanine</b>        | 19.8168                     | 188.1            | NS                 | 2.39806            | NS                        | 0.00005                   |
| <b>Lauryl Alcohol</b>   | 22.0027                     | 243.1            | 1.27167            | NS                 | 0.01445                   | NS                        |
| <b>Maleic Acid</b>      | 18.2630                     | 245.0            | NS                 | 0.68722            | NS                        | 0.04895                   |
| <b>Malic Acid</b>       | 23.0106                     | 233.1            | NS                 | 0.73291            | NS                        | 0.04836                   |
| <b>Malonic Acid</b>     | 15.4680                     | 233.1            | 0.75424            | NS                 | 0.02370                   | NS                        |
| <b>Pinitol</b>          | 30.8088                     | 260.2            | 1.33875            | NS                 | 0.01147                   | NS                        |
| <b>Propionic Acid</b>   | 18.8585                     | 292.2            | NS                 | 2.08458            | NS                        | 0.01253                   |
| <b>Saccharic Acid</b>   | 35.0341                     | 333.2            | 0.74697            | 1.32846            | 0.00476                   | 0.00815                   |
| <b>Sucrose</b>          | 44.9165                     | 361.2            | NS                 | 1.99803            | NS                        | 0.02979                   |
| <b>Tartaric Acid</b>    | 25.6516                     | 305.2            | 1.43056            | NS                 | 0.03744                   | NS                        |
| <b>Trehalose</b>        | 43.9602                     | 361.2            | NS                 | 18.99309           | NS                        | 0.00048                   |
| <b>Tyramine</b>         | 32.7431                     | 174.1            | NS                 | 0.59383            | NS                        | 0.00075                   |
| <b>Unknown</b>          | 33.6590                     | 204.1            | 1.26433            | NS                 | 0.00363                   | NS                        |
| <b>Unknown</b>          | 17.5759                     | 186.0            | 1.79713            | 2.62694            | 0.00452                   | 0.01497                   |
| <b>Unknown</b>          | 13.6890                     | 220.1            | 1.41853            | NS                 | 0.00884                   | NS                        |
| <b>Unknown</b>          | 30.8657                     | 217.1            | 1.32711            | NS                 | 0.00953                   | NS                        |
| <b>Unknown</b>          | 9.2975                      | 184.1            | 1.52453            | NS                 | 0.01137                   | NS                        |
| <b>Unknown</b>          | 47.8363                     | 204.2            | 1.43690            | 1.35843            | 0.01504                   | 0.04118                   |
| <b>Unknown</b>          | 47.2028                     | 204.1            | 1.21975            | 1.20442            | 0.03006                   | 0.04871                   |
| <b>Unknown</b>          | 32.5721                     | 221.2            | 1.21109            | NS                 | 0.03112                   | NS                        |
| <b>Unknown</b>          | 49.3385                     | 217.1            | 1.31458            | 1.40117            | 0.03151                   | 0.01702                   |
| <b>Unknown</b>          | 36.3824                     | 434.3            | 0.70531            | NS                 | 0.03570                   | NS                        |
| <b>Unknown</b>          | 21.0322                     | 189.1            | 1.20140            | NS                 | 0.04070                   | NS                        |
| <b>Unknown</b>          | 23.6949                     | 217.1            | NS                 | 3.31769            | NS                        | 0.00007                   |
| <b>Unknown</b>          | 32.7980                     | 205.1            | NS                 | 3.21406            | NS                        | 0.00002                   |
| <b>Unknown</b>          | 27.4875                     | 422.2            | NS                 | 3.08602            | NS                        | 0.01943                   |
| <b>Unknown</b>          | 17.5759                     | 186.0            | NS                 | 2.48604            | NS                        | 0.01419                   |
| <b>Unknown</b>          | 24.6017                     | 217.1            | NS                 | 2.38962            | NS                        | 0.00001                   |

|                |         |       |    |         |    |         |
|----------------|---------|-------|----|---------|----|---------|
| <b>Unknown</b> | 22.0509 | 307.2 | NS | 2.33226 | NS | 0.00220 |
| <b>Unknown</b> | 19.1101 | 184.1 | NS | 2.02055 | NS | 0.04568 |
| <b>Unknown</b> | 30.6073 | 150.1 | NS | 1.50572 | NS | 0.00020 |
| <b>Unknown</b> | 24.9767 | 313.3 | NS | 1.43477 | NS | 0.04725 |
| <b>Unknown</b> | 31.7135 | 275.2 | NS | 1.31801 | NS | 0.00069 |
| <b>Unknown</b> | 38.4361 | 331.1 | NS | 1.27114 | NS | 0.00650 |
| <b>Unknown</b> | 33.7685 | 270.2 | NS | 0.76019 | NS | 0.03895 |
| <b>Unknown</b> | 41.0710 | 274.1 | NS | 0.70608 | NS | 0.01860 |
| <b>Unknown</b> | 37.2316 | 204.1 | NS | 0.67959 | NS | 0.02484 |
| <b>Unknown</b> | 25.7858 | 331.2 | NS | 0.65537 | NS | 0.01841 |
| <b>Unknown</b> | 31.0367 | 292.2 | NS | 0.54155 | NS | 0.00025 |
| <b>Xylose</b>  | 26.8968 | 160.1 | NS | 0.60672 | NS | 0.00493 |

Only compounds are shown that were significantly different from Wt with abundance > 1.2 or < 0.8 fold-change and a P-value  $\leq 0.05$ . Ratio of average relative metabolite abundance is shown for *pdh1-1* and *pdh1-2* compared with Wt with N = 5. NS, not significant. Unknowns are compounds that were detected with unique ions, but did not have a confident library match (< 75%).

**Supplementary Table 2. Primer sequences used in this study**

| <b>Name</b>          | <b>Use</b>                               | <b>Sequence (5'-3')</b>   |
|----------------------|------------------------------------------|---------------------------|
| PDH1-1               | <i>mtpdh1-1</i> genotyping               | GAGCACTATTTCCATTGTAAAC    |
| Tnt1R                | <i>mtpdh1-1</i> genotyping               | CAGTGAACGAGCAGAACCTG      |
| PDH1-2               | <i>mtpdh1-2</i> genotyping               | ATGAGACTGGAGGGGGAGAT      |
| Tnt1F                | <i>mtpdh1-1</i> genotyping               | GAACATATGGCAGGGGGTTACAAG  |
| MtPDHqF1             | <i>mtpdh1-1</i> qPCR                     | AAACAAGGTCATACTCTAACTGCAA |
| MtPDHqR1             | <i>mtpdh1-1</i> qPCR                     | CAGCATCAAGGAATGCTGTAA     |
| MtPDHqF2             | <i>mtpdh1-2</i> qPCR                     | CAACAGATTCCGCCAGACAAGAGC  |
| MtPDHqR2             | <i>mtpdh1-2</i> qPCR                     | CTGGGTTCTGTCCTTCATCGA     |
| MtADHqF              | <i>MtADH</i> (Medtr4g115980) qPCR        | GACCTGAGAGTGGAAGCAGT      |
| MtADHqR              | <i>MtADH</i> (Medtr4g115980) qPCR        | TTCTCACACCTCGAAACCCT      |
| MtncADHqF            | <i>MtncADH</i> (Medtr5g083530) qPCR      | GCTAGTGAGGGTTGTAAGATGC    |
| MtncADHqR            | <i>MtncADH</i> (Medtr5g083530) qPCR      | GCGGGTAATTCTGTATTATT      |
| MtPI4KF <sup>1</sup> | housekeeping gene ( <i>MtPI4K</i> ) qPCR | GCAGATAGACACGCTGGGA       |
| MtPI4KR <sup>1</sup> | housekeeping gene ( <i>MtPI4K</i> ) qPCR | AACTCTTGGGCAGGCAATAA      |
| MtHPPD1F             | <i>MtHPPD1</i> (Medtr5g091060) qPCR      | CCCACCAACACCACTTCTCT      |
| MtHPPD1R             | <i>MtHPPD1</i> (Medtr5g091060) qPCR      | GGTGCTGGGTTACAGCATTT      |
| MtHGOF               | <i>MtHGO</i> (Medtr8g463280) qPCR        | AGGCACGGGTTCCCTTCTAAT     |
| MtHGOR               | <i>MtHGO</i> (Medtr8g463280) qPCR        | TCAATGAAATCCGTTGGTGA      |
| MtMAAIF              | <i>MtMAAI</i> (Medtr4g134370) qPCR       | CTTCCATGGGTCCAGAGTGT      |
| MtMAAIR              | <i>MtMAAI</i> (Medtr4g134370) qPCR       | CCGCCATGAAAACCTTCATCT     |
| MtFAHF               | <i>MtFAH</i> (Medtr2g025640) qPCR        | ACTTCGGACCCACATTGAAG      |
| MtFAHR               | <i>MtFAH</i> (Medtr2g025640) qPCR        | TCCACAGGTTTTCCAGTTC       |
| MtVPEF <sup>2</sup>  | <i>MtVPE</i> (Medtr1g016780) qPCR        | AGTTCTGCCTGTTGTGGAATGTC   |
| MtVPER <sup>2</sup>  | <i>MtVPE</i> (Medtr1g016780) qPCR        | GGTAGCTCCTGTCTGCCAATTAC   |

<sup>1</sup> Housekeeping gene (Kryvoruchko et al., 2016) used in normalization of qPCR data.

<sup>2</sup> Cysteine protease (vacuolar processing enzyme; VPE) that serves as a senescence marker gene (Pérez Guerra et al., 2010).
